# Supplementary material for: To Kill, Stay or Flee: The Effects of Lions and Landscape Factors on Habitat and Kill Site Selection of Cheetahs in South Africa
Source: PubMed Central journal article supplement (PMC4333767; doi:10.1371/journal.pone.0117743), 2015-02-18
Supplement: pone.0117743.s002.pdf [file pone.0117743.s002.pdf]

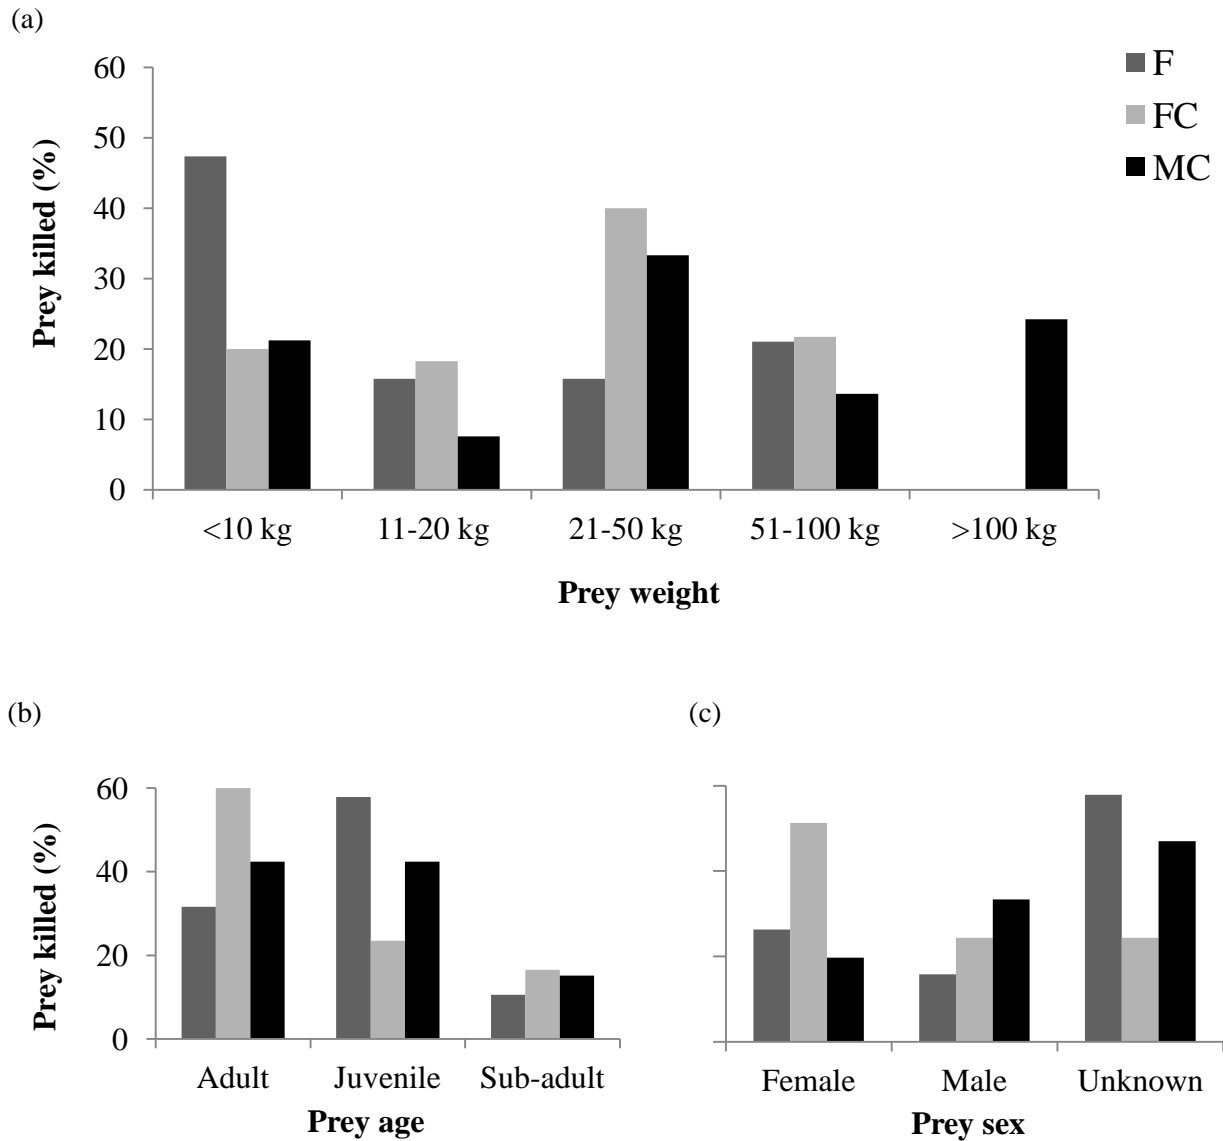

**Figure S2 Prey categories by: (a) weight, (b) age, and (c) sex of kills ( $n = 200$ ) made by cheetahs from three types of social groups (F = solitary females, FC = females with cubs, MC = male coalitions).**
