# Supplementary material for: To Kill, Stay or Flee: The Effects of Lions and Landscape Factors on Habitat and Kill Site Selection of Cheetahs in South Africa
Source: PubMed Central journal article supplement (PMC4333767; doi:10.1371/journal.pone.0117743), 2015-02-18
Supplement: pone.0117743.s004.pdf [file pone.0117743.s004.pdf]

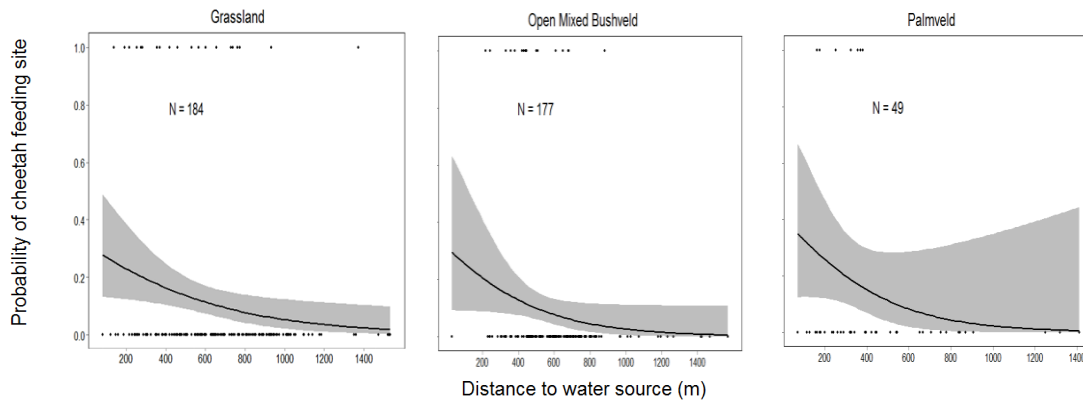

**Figure S4 Relationship between distance to water source and the probability of cheetah feeding site within grassland, open mixed bushveld and palmveld habitats during summer.**
